# Supplementary material
Source: MDPI journal article supplement (https://www.mdpi.com/2071-1050/9/12/2294)
Supplement: s1 [file s1]

Supplementary Material for:

**Nutrient concentrations of bush bean (*Phaseolus vulgaris* L.) and potato (*Solanum tuberosum* L.) cultivated in subarctic soils managed with intercropping and willow (*Salix* Spp.) agroforestry**

**Table S1.** Ternary plot coordinates (%) for nutrition limits for bush bean and potato plant analysis during in bud to early flower growth stages.

| <b>Ternary plot axis</b>                  | <b>X</b>           | <b>Y</b>           | <b>Z</b>             |
|-------------------------------------------|--------------------|--------------------|----------------------|
| <b>Axis name</b>                          | <b>K/(N+10P+K)</b> | <b>N/(N+10P+K)</b> | <b>10P/(N+10P+K)</b> |
| <b>Limitation line coordinates</b>        |                    |                    |                      |
| Bush bean ( <i>Phaseolus vulgaris</i> L.) |                    |                    |                      |
| [K or K+N] to [N]                         | 23.54              | 28.25              | 48.21                |
| [N] to [P or P+N]                         | 30.20              | 36.24              | 33.56                |
| [K or K+N] to [P or P+N]                  | 18.98              | 42.06              | 38.96                |
| Potato-( <i>Solanum tuberosum</i> L.)     |                    |                    |                      |
| [K or K+N] to [N]                         | 37.05              | 29.64              | 33.31                |
| [N] to [P or P+N]                         | 44.05              | 35.24              | 20.71                |
| [K or K+N] to [P or P+N]                  | 29.11              | 44.66              | 26.23                |

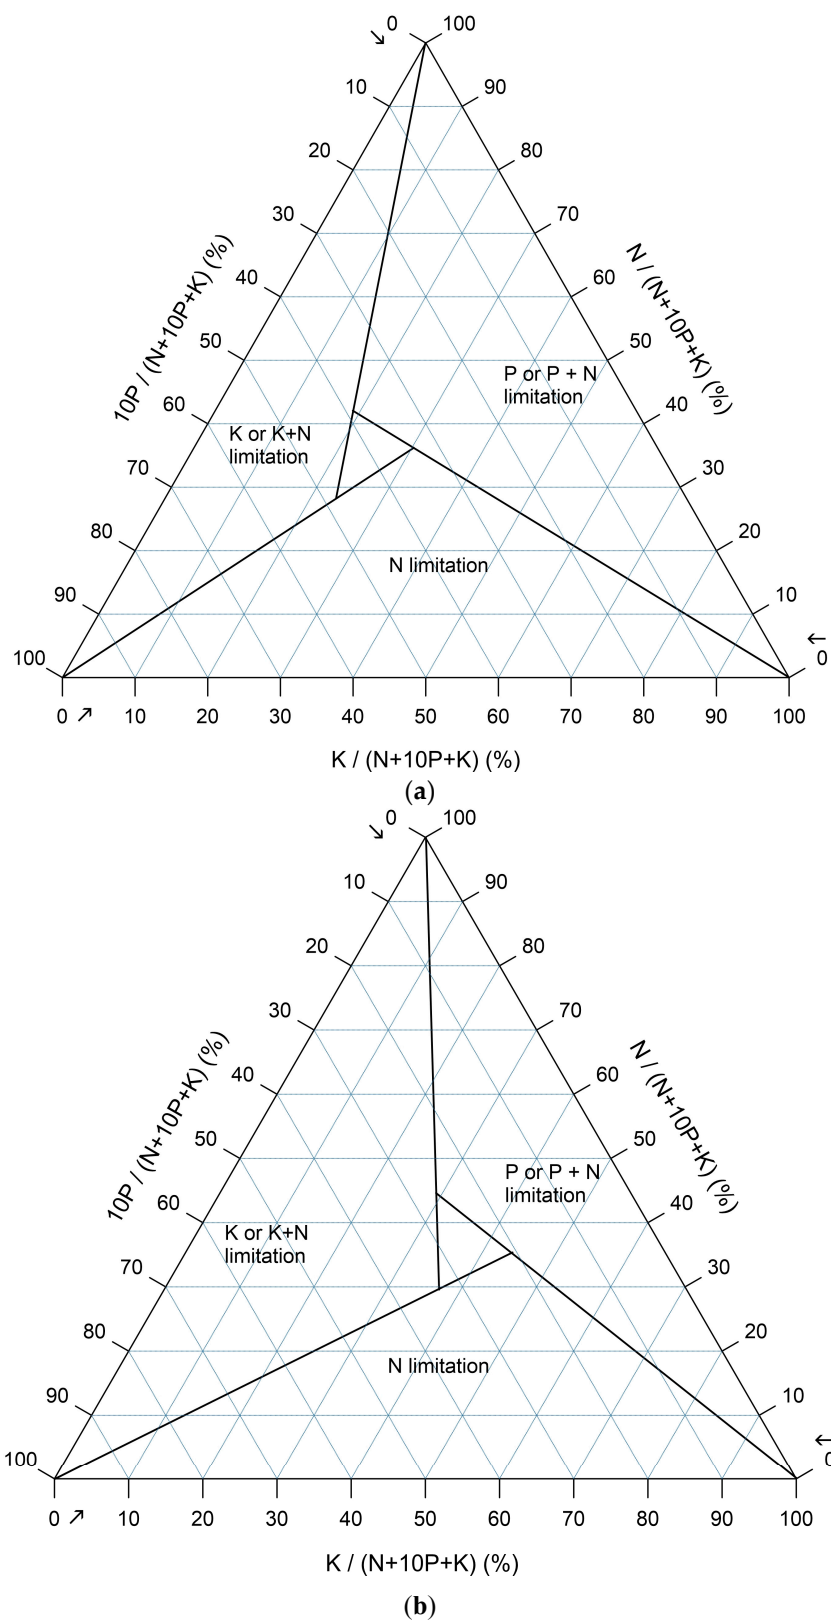

**Figure S1.** Nutrient ternary plot for plant analysis during in bud to early flower growth stages for: (a) bush bean; and (b) potato.
